# Supplementary material
Source: ML conference proceedings conference paper supplement (https://openreview.net/forum?id=pdF86dyoS6)
Supplement: supplementary_material [file ENB2012_data.xlsx]

## Sheet: Φύλλο1
X1	X2	X3	X4	X5	X6	X7	X8	Y1	Y2
0.98	514.5	294	110.25	7	2	0	0	15.55	21.33
0.98	514.5	294	110.25	7	3	0	0	15.55	21.33
0.98	514.5	294	110.25	7	4	0	0	15.55	21.33
0.98	514.5	294	110.25	7	5	0	0	15.55	21.33
0.9	563.5	318.5	122.5	7	2	0	0	20.84	28.28
0.9	563.5	318.5	122.5	7	3	0	0	21.46	25.38
0.9	563.5	318.5	122.5	7	4	0	0	20.71	25.16
0.9	563.5	318.5	122.5	7	5	0	0	19.68	29.6
0.86	588	294	147	7	2	0	0	19.5	27.3
0.86	588	294	147	7	3	0	0	19.95	21.97
0.86	588	294	147	7	4	0	0	19.34	23.49
0.86	588	294	147	7	5	0	0	18.31	27.87
0.82	612.5	318.5	147	7	2	0	0	17.05	23.77
0.82	612.5	318.5	147	7	3	0	0	17.41	21.46
0.82	612.5	318.5	147	7	4	0	0	16.95	21.16
0.82	612.5	318.5	147	7	5	0	0	15.98	24.93
0.79	637	343	147	7	2	0	0	28.52	37.73
0.79	637	343	147	7	3	0	0	29.9	31.27
0.79	637	343	147	7	4	0	0	29.63	30.93
0.79	637	343	147	7	5	0	0	28.75	39.44
0.76	661.5	416.5	122.5	7	2	0	0	24.77	29.79
0.76	661.5	416.5	122.5	7	3	0	0	23.93	29.68
0.76	661.5	416.5	122.5	7	4	0	0	24.77	29.79
0.76	661.5	416.5	122.5	7	5	0	0	23.93	29.4
0.74	686	245	220.5	3.5	2	0	0	6.07	10.9
0.74	686	245	220.5	3.5	3	0	0	6.05	11.19
0.74	686	245	220.5	3.5	4	0	0	6.01	10.94
0.74	686	245	220.5	3.5	5	0	0	6.04	11.17
0.71	710.5	269.5	220.5	3.5	2	0	0	6.37	11.27
0.71	710.5	269.5	220.5	3.5	3	0	0	6.4	11.72
0.71	710.5	269.5	220.5	3.5	4	0	0	6.366	11.29
0.71	710.5	269.5	220.5	3.5	5	0	0	6.4	11.67
0.69	735	294	220.5	3.5	2	0	0	6.85	11.74
0.69	735	294	220.5	3.5	3	0	0	6.79	12.05
0.69	735	294	220.5	3.5	4	0	0	6.77	11.73
0.69	735	294	220.5	3.5	5	0	0	6.81	11.93
0.66	759.5	318.5	220.5	3.5	2	0	0	7.18	12.4
0.66	759.5	318.5	220.5	3.5	3	0	0	7.1	12.23
0.66	759.5	318.5	220.5	3.5	4	0	0	7.1	12.4
0.66	759.5	318.5	220.5	3.5	5	0	0	7.1	12.14
0.64	784	343	220.5	3.5	2	0	0	10.85	16.78
0.64	784	343	220.5	3.5	3	0	0	10.54	16.8
0.64	784	343	220.5	3.5	4	0	0	10.77	16.75
0.64	784	343	220.5	3.5	5	0	0	10.56	16.67
0.62	808.5	367.5	220.5	3.5	2	0	0	8.6	12.07
0.62	808.5	367.5	220.5	3.5	3	0	0	8.49	12.22
0.62	808.5	367.5	220.5	3.5	4	0	0	8.45	12.08
0.62	808.5	367.5	220.5	3.5	5	0	0	8.5	12.04
0.98	514.5	294	110.25	7	2	0.1	1	24.58	26.47
0.98	514.5	294	110.25	7	3	0.1	1	24.63	26.37
0.98	514.5	294	110.25	7	4	0.1	1	24.63	26.44
0.98	514.5	294	110.25	7	5	0.1	1	24.59	26.29
0.9	563.5	318.5	122.5	7	2	0.1	1	29.03	32.92
0.9	563.5	318.5	122.5	7	3	0.1	1	29.87	29.87
0.9	563.5	318.5	122.5	7	4	0.1	1	29.14	29.58
0.9	563.5	318.5	122.5	7	5	0.1	1	28.09	34.33
0.86	588	294	147	7	2	0.1	1	26.28	30.89
0.86	588	294	147	7	3	0.1	1	26.91	25.6
0.86	588	294	147	7	4	0.1	1	26.37	27.03
0.86	588	294	147	7	5	0.1	1	25.27	31.73
0.82	612.5	318.5	147	7	2	0.1	1	23.53	27.31
0.82	612.5	318.5	147	7	3	0.1	1	24.03	24.91
0.82	612.5	318.5	147	7	4	0.1	1	23.54	24.61
0.82	612.5	318.5	147	7	5	0.1	1	22.58	28.51
0.79	637	343	147	7	2	0.1	1	35.56	41.68
0.79	637	343	147	7	3	0.1	1	37.12	35.28
0.79	637	343	147	7	4	0.1	1	36.9	34.43
0.79	637	343	147	7	5	0.1	1	35.94	43.33
0.76	661.5	416.5	122.5	7	2	0.1	1	32.96	33.87
0.76	661.5	416.5	122.5	7	3	0.1	1	32.12	34.07
0.76	661.5	416.5	122.5	7	4	0.1	1	32.94	34.14
0.76	661.5	416.5	122.5	7	5	0.1	1	32.21	33.67
0.74	686	245	220.5	3.5	2	0.1	1	10.36	13.43
0.74	686	245	220.5	3.5	3	0.1	1	10.43	13.71
0.74	686	245	220.5	3.5	4	0.1	1	10.36	13.48
0.74	686	245	220.5	3.5	5	0.1	1	10.39	13.7
0.71	710.5	269.5	220.5	3.5	2	0.1	1	10.71	13.8
0.71	710.5	269.5	220.5	3.5	3	0.1	1	10.8	14.28
0.71	710.5	269.5	220.5	3.5	4	0.1	1	10.7	13.87
0.71	710.5	269.5	220.5	3.5	5	0.1	1	10.75	14.27
0.69	735	294	220.5	3.5	2	0.1	1	11.11	14.28
0.69	735	294	220.5	3.5	3	0.1	1	11.13	14.61
0.69	735	294	220.5	3.5	4	0.1	1	11.09	14.3
0.69	735	294	220.5	3.5	5	0.1	1	11.16	14.45
0.66	759.5	318.5	220.5	3.5	2	0.1	1	11.68	13.9
0.66	759.5	318.5	220.5	3.5	3	0.1	1	11.69	13.72
0.66	759.5	318.5	220.5	3.5	4	0.1	1	11.7	13.88
0.66	759.5	318.5	220.5	3.5	5	0.1	1	11.69	13.65
0.64	784	343	220.5	3.5	2	0.1	1	15.41	19.37
0.64	784	343	220.5	3.5	3	0.1	1	15.2	19.43
0.64	784	343	220.5	3.5	4	0.1	1	15.42	19.34
0.64	784	343	220.5	3.5	5	0.1	1	15.21	19.32
0.62	808.5	367.5	220.5	3.5	2	0.1	1	12.96	14.34
0.62	808.5	367.5	220.5	3.5	3	0.1	1	12.97	14.5
0.62	808.5	367.5	220.5	3.5	4	0.1	1	12.93	14.33
0.62	808.5	367.5	220.5	3.5	5	0.1	1	13.02	14.27
0.98	514.5	294	110.25	7	2	0.1	2	24.29	25.95
0.98	514.5	294	110.25	7	3	0.1	2	24.31	25.63
0.98	514.5	294	110.25	7	4	0.1	2	24.13	26.13
0.98	514.5	294	110.25	7	5	0.1	2	24.25	25.89
0.9	563.5	318.5	122.5	7	2	0.1	2	28.88	32.54
0.9	563.5	318.5	122.5	7	3	0.1	2	29.68	29.44
0.9	563.5	318.5	122.5	7	4	0.1	2	28.83	29.36
0.9	563.5	318.5	122.5	7	5	0.1	2	27.9	34.2
0.86	588	294	147	7	2	0.1	2	26.48	30.91
0.86	588	294	147	7	3	0.1	2	27.02	25.63
0.86	588	294	147	7	4	0.1	2	26.33	27.36
0.86	588	294	147	7	5	0.1	2	25.36	31.9
0.82	612.5	318.5	147	7	2	0.1	2	23.75	27.38
0.82	612.5	318.5	147	7	3	0.1	2	24.23	25.02
0.82	612.5	318.5	147	7	4	0.1	2	23.67	24.8
0.82	612.5	318.5	147	7	5	0.1	2	22.79	28.79
0.79	637	343	147	7	2	0.1	2	35.65	41.07
0.79	637	343	147	7	3	0.1	2	37.26	34.62
0.79	637	343	147	7	4	0.1	2	36.97	33.87
0.79	637	343	147	7	5	0.1	2	36.03	42.86
0.76	661.5	416.5	122.5	7	2	0.1	2	33.16	33.91
0.76	661.5	416.5	122.5	7	3	0.1	2	32.4	34.07
0.76	661.5	416.5	122.5	7	4	0.1	2	33.12	34.17
0.76	661.5	416.5	122.5	7	5	0.1	2	32.41	33.78
0.74	686	245	220.5	3.5	2	0.1	2	10.42	13.39
0.74	686	245	220.5	3.5	3	0.1	2	10.46	13.72
0.74	686	245	220.5	3.5	4	0.1	2	10.32	13.57
0.74	686	245	220.5	3.5	5	0.1	2	10.45	13.79
0.71	710.5	269.5	220.5	3.5	2	0.1	2	10.64	13.67
0.71	710.5	269.5	220.5	3.5	3	0.1	2	10.72	14.11
0.71	710.5	269.5	220.5	3.5	4	0.1	2	10.55	13.8
0.71	710.5	269.5	220.5	3.5	5	0.1	2	10.68	14.21
0.69	735	294	220.5	3.5	2	0.1	2	11.45	13.2
0.69	735	294	220.5	3.5	3	0.1	2	11.46	13.54
0.69	735	294	220.5	3.5	4	0.1	2	11.32	13.32
0.69	735	294	220.5	3.5	5	0.1	2	11.49	13.51
0.66	759.5	318.5	220.5	3.5	2	0.1	2	11.45	14.86
0.66	759.5	318.5	220.5	3.5	3	0.1	2	11.42	14.75
0.66	759.5	318.5	220.5	3.5	4	0.1	2	11.33	15
0.66	759.5	318.5	220.5	3.5	5	0.1	2	11.43	14.74
0.64	784	343	220.5	3.5	2	0.1	2	15.41	19.23
0.64	784	343	220.5	3.5	3	0.1	2	15.18	19.34
0.64	784	343	220.5	3.5	4	0.1	2	15.34	19.32
0.64	784	343	220.5	3.5	5	0.1	2	15.19	19.3
0.62	808.5	367.5	220.5	3.5	2	0.1	2	12.88	14.37
0.62	808.5	367.5	220.5	3.5	3	0.1	2	13	14.57
0.62	808.5	367.5	220.5	3.5	4	0.1	2	12.97	14.27
0.62	808.5	367.5	220.5	3.5	5	0.1	2	13.04	14.24
0.98	514.5	294	110.25	7	2	0.1	3	24.28	25.68
0.98	514.5	294	110.25	7	3	0.1	3	24.4	26.02
0.98	514.5	294	110.25	7	4	0.1	3	24.11	25.84
0.98	514.5	294	110.25	7	5	0.1	3	24.35	26.14
0.9	563.5	318.5	122.5	7	2	0.1	3	28.07	34.14
0.9	563.5	318.5	122.5	7	3	0.1	3	29.01	32.85
0.9	563.5	318.5	122.5	7	4	0.1	3	29.62	30.08
0.9	563.5	318.5	122.5	7	5	0.1	3	29.05	29.67
0.86	588	294	147	7	2	0.1	3	25.41	31.73
0.86	588	294	147	7	3	0.1	3	26.47	31.01
0.86	588	294	147	7	4	0.1	3	26.89	25.9
0.86	588	294	147	7	5	0.1	3	26.46	27.4
0.82	612.5	318.5	147	7	2	0.1	3	22.93	28.68
0.82	612.5	318.5	147	7	3	0.1	3	23.84	27.54
0.82	612.5	318.5	147	7	4	0.1	3	24.17	25.35
0.82	612.5	318.5	147	7	5	0.1	3	23.87	24.93
0.79	637	343	147	7	2	0.1	3	35.78	43.12
0.79	637	343	147	7	3	0.1	3	35.48	41.22
0.79	637	343	147	7	4	0.1	3	36.97	35.1
0.79	637	343	147	7	5	0.1	3	36.7	34.29
0.76	661.5	416.5	122.5	7	2	0.1	3	32.52	33.85
0.76	661.5	416.5	122.5	7	3	0.1	3	33.28	34.11
0.76	661.5	416.5	122.5	7	4	0.1	3	32.33	34.48
0.76	661.5	416.5	122.5	7	5	0.1	3	33.24	34.5
0.74	686	245	220.5	3.5	2	0.1	3	10.39	13.6
0.74	686	245	220.5	3.5	3	0.1	3	10.34	13.36
0.74	686	245	220.5	3.5	4	0.1	3	10.35	13.65
0.74	686	245	220.5	3.5	5	0.1	3	10.38	13.49
0.71	710.5	269.5	220.5	3.5	2	0.1	3	10.77	14.14
0.71	710.5	269.5	220.5	3.5	3	0.1	3	10.68	13.77
0.71	710.5	269.5	220.5	3.5	4	0.1	3	10.68	14.3
0.71	710.5	269.5	220.5	3.5	5	0.1	3	10.7	13.87
0.69	735	294	220.5	3.5	2	0.1	3	11.22	14.44
0.69	735	294	220.5	3.5	3	0.1	3	11.16	14.27
0.69	735	294	220.5	3.5	4	0.1	3	11.1	14.67
0.69	735	294	220.5	3.5	5	0.1	3	11.14	14.4
0.66	759.5	318.5	220.5	3.5	2	0.1	3	11.59	13.46
0.66	759.5	318.5	220.5	3.5	3	0.1	3	11.6	13.7
0.66	759.5	318.5	220.5	3.5	4	0.1	3	11.53	13.59
0.66	759.5	318.5	220.5	3.5	5	0.1	3	11.61	13.83
0.64	784	343	220.5	3.5	2	0.1	3	15.16	19.14
0.64	784	343	220.5	3.5	3	0.1	3	15.36	19.18
0.64	784	343	220.5	3.5	4	0.1	3	15.12	19.37
0.64	784	343	220.5	3.5	5	0.1	3	15.36	19.29
0.62	808.5	367.5	220.5	3.5	2	0.1	3	12.68	14.09
0.62	808.5	367.5	220.5	3.5	3	0.1	3	12.63	14.23
0.62	808.5	367.5	220.5	3.5	4	0.1	3	12.71	14.14
0.62	808.5	367.5	220.5	3.5	5	0.1	3	12.73	13.89
0.98	514.5	294	110.25	7	2	0.1	4	24.38	25.91
0.98	514.5	294	110.25	7	3	0.1	4	24.23	25.72
0.98	514.5	294	110.25	7	4	0.1	4	24.04	26.18
0.98	514.5	294	110.25	7	5	0.1	4	24.32	25.87
0.9	563.5	318.5	122.5	7	2	0.1	4	29.06	29.34
0.9	563.5	318.5	122.5	7	3	0.1	4	28.05	33.91
0.9	563.5	318.5	122.5	7	4	0.1	4	28.86	32.83
0.9	563.5	318.5	122.5	7	5	0.1	4	29.79	29.92
0.86	588	294	147	7	2	0.1	4	26.44	27.17
0.86	588	294	147	7	3	0.1	4	25.37	31.76
0.86	588	294	147	7	4	0.1	4	26.33	31.06
0.86	588	294	147	7	5	0.1	4	27.03	25.81
0.82	612.5	318.5	147	7	2	0.1	4	23.8	24.61
0.82	612.5	318.5	147	7	3	0.1	4	22.8	28.61
0.82	612.5	318.5	147	7	4	0.1	4	23.59	27.57
0.82	612.5	318.5	147	7	5	0.1	4	24.24	25.16
0.79	637	343	147	7	2	0.1	4	36.86	34.25
0.79	637	343	147	7	3	0.1	4	35.89	43.3
0.79	637	343	147	7	4	0.1	4	35.45	41.86
0.79	637	343	147	7	5	0.1	4	37.1	35.29
0.76	661.5	416.5	122.5	7	2	0.1	4	33.08	34.11
0.76	661.5	416.5	122.5	7	3	0.1	4	32.38	33.62
0.76	661.5	416.5	122.5	7	4	0.1	4	33.09	33.89
0.76	661.5	416.5	122.5	7	5	0.1	4	32.31	34.05
0.74	686	245	220.5	3.5	2	0.1	4	10.08	13.2
0.74	686	245	220.5	3.5	3	0.1	4	10.15	13.36
0.74	686	245	220.5	3.5	4	0.1	4	10.07	13.21
0.74	686	245	220.5	3.5	5	0.1	4	10.14	13.53
0.71	710.5	269.5	220.5	3.5	2	0.1	4	10.66	13.67
0.71	710.5	269.5	220.5	3.5	3	0.1	4	10.68	14.12
0.71	710.5	269.5	220.5	3.5	4	0.1	4	10.53	13.79
0.71	710.5	269.5	220.5	3.5	5	0.1	4	10.72	14.2
0.69	735	294	220.5	3.5	2	0.1	4	11.18	14.29
0.69	735	294	220.5	3.5	3	0.1	4	11.22	14.49
0.69	735	294	220.5	3.5	4	0.1	4	11.07	14.42
0.69	735	294	220.5	3.5	5	0.1	4	11.2	14.73
0.66	759.5	318.5	220.5	3.5	2	0.1	4	11.44	14.86
0.66	759.5	318.5	220.5	3.5	3	0.1	4	11.42	14.67
0.66	759.5	318.5	220.5	3.5	4	0.1	4	11.33	15
0.66	759.5	318.5	220.5	3.5	5	0.1	4	11.43	14.83
0.64	784	343	220.5	3.5	2	0.1	4	15.4	19.24
0.64	784	343	220.5	3.5	3	0.1	4	15.19	19.25
0.64	784	343	220.5	3.5	4	0.1	4	15.32	19.42
0.64	784	343	220.5	3.5	5	0.1	4	15.16	19.48
0.62	808.5	367.5	220.5	3.5	2	0.1	4	12.85	14.37
0.62	808.5	367.5	220.5	3.5	3	0.1	4	13.04	14.34
0.62	808.5	367.5	220.5	3.5	4	0.1	4	13	14.28
0.62	808.5	367.5	220.5	3.5	5	0.1	4	13	14.47
0.98	514.5	294	110.25	7	2	0.1	5	24.35	25.64
0.98	514.5	294	110.25	7	3	0.1	5	24.33	25.98
0.98	514.5	294	110.25	7	4	0.1	5	24.03	25.88
0.98	514.5	294	110.25	7	5	0.1	5	24.26	26.18
0.9	563.5	318.5	122.5	7	2	0.1	5	29.83	29.82
0.9	563.5	318.5	122.5	7	3	0.1	5	29.08	29.52
0.9	563.5	318.5	122.5	7	4	0.1	5	28.03	34.45
0.9	563.5	318.5	122.5	7	5	0.1	5	29.02	33.01
0.86	588	294	147	7	2	0.1	5	27.03	25.82
0.86	588	294	147	7	3	0.1	5	26.45	27.33
0.86	588	294	147	7	4	0.1	5	25.36	32.04
0.86	588	294	147	7	5	0.1	5	26.45	31.28
0.82	612.5	318.5	147	7	2	0.1	5	24.37	25.11
0.82	612.5	318.5	147	7	3	0.1	5	23.89	24.77
0.82	612.5	318.5	147	7	4	0.1	5	22.89	28.88
0.82	612.5	318.5	147	7	5	0.1	5	23.86	27.69
0.79	637	343	147	7	2	0.1	5	37.03	34.99
0.79	637	343	147	7	3	0.1	5	36.71	34.18
0.79	637	343	147	7	4	0.1	5	36.77	43.14
0.79	637	343	147	7	5	0.1	5	35.48	41.26
0.76	661.5	416.5	122.5	7	2	0.1	5	32.31	34.25
0.76	661.5	416.5	122.5	7	3	0.1	5	33.21	34.35
0.76	661.5	416.5	122.5	7	4	0.1	5	32.46	33.64
0.76	661.5	416.5	122.5	7	5	0.1	5	33.27	33.88
0.74	686	245	220.5	3.5	2	0.1	5	10.47	13.65
0.74	686	245	220.5	3.5	3	0.1	5	10.37	13.44
0.74	686	245	220.5	3.5	4	0.1	5	10.34	13.72
0.74	686	245	220.5	3.5	5	0.1	5	10.39	13.5
0.71	710.5	269.5	220.5	3.5	2	0.1	5	10.78	14.18
0.71	710.5	269.5	220.5	3.5	3	0.1	5	10.7	13.75
0.71	710.5	269.5	220.5	3.5	4	0.1	5	10.67	14.26
0.71	710.5	269.5	220.5	3.5	5	0.1	5	13.69	13.89
0.69	735	294	220.5	3.5	2	0.1	5	11.21	14.55
0.69	735	294	220.5	3.5	3	0.1	5	11.14	14.28
0.69	735	294	220.5	3.5	4	0.1	5	11.11	14.46
0.69	735	294	220.5	3.5	5	0.1	5	11.16	14.39
0.66	759.5	318.5	220.5	3.5	2	0.1	5	11.38	14.54
0.66	759.5	318.5	220.5	3.5	3	0.1	5	11.34	14.81
0.66	759.5	318.5	220.5	3.5	4	0.1	5	11.22	14.65
0.66	759.5	318.5	220.5	3.5	5	0.1	5	11.34	14.87
0.64	784	343	220.5	3.5	2	0.1	5	15.16	19.24
0.64	784	343	220.5	3.5	3	0.1	5	15.37	19.18
0.64	784	343	220.5	3.5	4	0.1	5	15.12	19.26
0.64	784	343	220.5	3.5	5	0.1	5	15.36	19.29
0.62	808.5	367.5	220.5	3.5	2	0.1	5	12.59	14.24
0.62	808.5	367.5	220.5	3.5	3	0.1	5	12.74	13.97
0.62	808.5	367.5	220.5	3.5	4	0.1	5	12.8	13.99
0.62	808.5	367.5	220.5	3.5	5	0.1	5	12.62	14.15
0.98	514.5	294	110.25	7	2	0.25	1	28.15	29.79
0.98	514.5	294	110.25	7	3	0.25	1	28.15	29.79
0.98	514.5	294	110.25	7	4	0.25	1	28.37	29.28
0.98	514.5	294	110.25	7	5	0.25	1	28.41	29.49
0.9	563.5	318.5	122.5	7	2	0.25	1	32.68	36.12
0.9	563.5	318.5	122.5	7	3	0.25	1	33.48	33.17
0.9	563.5	318.5	122.5	7	4	0.25	1	32.84	32.71
0.9	563.5	318.5	122.5	7	5	0.25	1	32	37.58
0.86	588	294	147	7	2	0.25	1	29.54	33.98
0.86	588	294	147	7	3	0.25	1	30.05	28.61
0.86	588	294	147	7	4	0.25	1	29.6	30.12
0.86	588	294	147	7	5	0.25	1	28.66	34.73
0.82	612.5	318.5	147	7	2	0.25	1	26.84	30.17
0.82	612.5	318.5	147	7	3	0.25	1	27.27	27.84
0.82	612.5	318.5	147	7	4	0.25	1	26.97	27.25
0.82	612.5	318.5	147	7	5	0.25	1	26.19	31.39
0.79	637	343	147	7	2	0.25	1	38.67	43.8
0.79	637	343	147	7	3	0.25	1	40.03	37.81
0.79	637	343	147	7	4	0.25	1	39.86	36.85
0.79	637	343	147	7	5	0.25	1	39.04	45.52
0.76	661.5	416.5	122.5	7	2	0.25	1	36.96	36.85
0.76	661.5	416.5	122.5	7	3	0.25	1	36.13	37.58
0.76	661.5	416.5	122.5	7	4	0.25	1	36.91	37.45
0.76	661.5	416.5	122.5	7	5	0.25	1	36.43	36.62
0.74	686	245	220.5	3.5	2	0.25	1	12.43	15.19
0.74	686	245	220.5	3.5	3	0.25	1	12.5	15.5
0.74	686	245	220.5	3.5	4	0.25	1	12.41	15.28
0.74	686	245	220.5	3.5	5	0.25	1	12.45	15.5
0.71	710.5	269.5	220.5	3.5	2	0.25	1	12.57	15.42
0.71	710.5	269.5	220.5	3.5	3	0.25	1	12.65	15.85
0.71	710.5	269.5	220.5	3.5	4	0.25	1	12.57	15.44
0.71	710.5	269.5	220.5	3.5	5	0.25	1	12.63	15.81
0.69	735	294	220.5	3.5	2	0.25	1	12.78	15.21
0.69	735	294	220.5	3.5	3	0.25	1	12.93	15.63
0.69	735	294	220.5	3.5	4	0.25	1	12.73	15.48
0.69	735	294	220.5	3.5	5	0.25	1	12.72	15.78
0.66	759.5	318.5	220.5	3.5	2	0.25	1	13.17	16.39
0.66	759.5	318.5	220.5	3.5	3	0.25	1	13.18	16.27
0.66	759.5	318.5	220.5	3.5	4	0.25	1	13.17	16.39
0.66	759.5	318.5	220.5	3.5	5	0.25	1	13.18	16.19
0.64	784	343	220.5	3.5	2	0.25	1	17.5	21.13
0.64	784	343	220.5	3.5	3	0.25	1	17.35	21.19
0.64	784	343	220.5	3.5	4	0.25	1	17.52	21.09
0.64	784	343	220.5	3.5	5	0.25	1	17.37	21.08
0.62	808.5	367.5	220.5	3.5	2	0.25	1	15.09	15.77
0.62	808.5	367.5	220.5	3.5	3	0.25	1	15.12	15.95
0.62	808.5	367.5	220.5	3.5	4	0.25	1	15.08	15.77
0.62	808.5	367.5	220.5	3.5	5	0.25	1	15.16	15.76
0.98	514.5	294	110.25	7	2	0.25	2	28.67	29.62
0.98	514.5	294	110.25	7	3	0.25	2	28.57	29.69
0.98	514.5	294	110.25	7	4	0.25	2	28.18	30.18
0.98	514.5	294	110.25	7	5	0.25	2	28.6	30.02
0.9	563.5	318.5	122.5	7	2	0.25	2	32.46	35.56
0.9	563.5	318.5	122.5	7	3	0.25	2	33.27	32.64
0.9	563.5	318.5	122.5	7	4	0.25	2	32.33	32.77
0.9	563.5	318.5	122.5	7	5	0.25	2	31.66	37.72
0.86	588	294	147	7	2	0.25	2	29.34	33.37
0.86	588	294	147	7	3	0.25	2	29.87	27.89
0.86	588	294	147	7	4	0.25	2	29.27	29.9
0.86	588	294	147	7	5	0.25	2	28.4	34.52
0.82	612.5	318.5	147	7	2	0.25	2	25.74	28.27
0.82	612.5	318.5	147	7	3	0.25	2	25.98	26.96
0.82	612.5	318.5	147	7	4	0.25	2	25.38	26.72
0.82	612.5	318.5	147	7	5	0.25	2	24.94	29.88
0.79	637	343	147	7	2	0.25	2	38.57	43.86
0.79	637	343	147	7	3	0.25	2	40.19	37.41
0.79	637	343	147	7	4	0.25	2	39.97	36.77
0.79	637	343	147	7	5	0.25	2	38.98	45.97
0.76	661.5	416.5	122.5	7	2	0.25	2	36.95	36.87
0.76	661.5	416.5	122.5	7	3	0.25	2	36.28	37.35
0.76	661.5	416.5	122.5	7	4	0.25	2	36.86	37.28
0.76	661.5	416.5	122.5	7	5	0.25	2	36.45	36.81
0.74	686	245	220.5	3.5	2	0.25	2	12.35	14.73
0.74	686	245	220.5	3.5	3	0.25	2	12.45	15.1
0.74	686	245	220.5	3.5	4	0.25	2	12.16	15.18
0.74	686	245	220.5	3.5	5	0.25	2	12.3	15.44
0.71	710.5	269.5	220.5	3.5	2	0.25	2	12.33	14.91
0.71	710.5	269.5	220.5	3.5	3	0.25	2	12.29	15.4
0.71	710.5	269.5	220.5	3.5	4	0.25	2	12.2	14.94
0.71	710.5	269.5	220.5	3.5	5	0.25	2	12.49	15.32
0.69	735	294	220.5	3.5	2	0.25	2	12.85	15.52
0.69	735	294	220.5	3.5	3	0.25	2	12.87	15.85
0.69	735	294	220.5	3.5	4	0.25	2	12.73	15.66
0.69	735	294	220.5	3.5	5	0.25	2	12.95	15.99
0.66	759.5	318.5	220.5	3.5	2	0.25	2	13.05	15.89
0.66	759.5	318.5	220.5	3.5	3	0.25	2	12.93	15.85
0.66	759.5	318.5	220.5	3.5	4	0.25	2	12.77	16.22
0.66	759.5	318.5	220.5	3.5	5	0.25	2	13	15.87
0.64	784	343	220.5	3.5	2	0.25	2	17.14	20.47
0.64	784	343	220.5	3.5	3	0.25	2	16.84	20.56
0.64	784	343	220.5	3.5	4	0.25	2	17.02	20.48
0.64	784	343	220.5	3.5	5	0.25	2	17.11	20.43
0.62	808.5	367.5	220.5	3.5	2	0.25	2	14.34	15.32
0.62	808.5	367.5	220.5	3.5	3	0.25	2	14.66	15.64
0.62	808.5	367.5	220.5	3.5	4	0.25	2	14.6	15.14
0.62	808.5	367.5	220.5	3.5	5	0.25	2	14.6	15.3
0.98	514.5	294	110.25	7	2	0.25	3	28.67	29.43
0.98	514.5	294	110.25	7	3	0.25	3	28.56	29.78
0.98	514.5	294	110.25	7	4	0.25	3	28.17	30.1
0.98	514.5	294	110.25	7	5	0.25	3	28.63	30.19
0.9	563.5	318.5	122.5	7	2	0.25	3	31.63	36.35
0.9	563.5	318.5	122.5	7	3	0.25	3	32.4	35.1
0.9	563.5	318.5	122.5	7	4	0.25	3	32.68	32.83
0.9	563.5	318.5	122.5	7	5	0.25	3	32.29	32.46
0.86	588	294	147	7	2	0.25	3	28.4	33.52
0.86	588	294	147	7	3	0.25	3	29.4	32.93
0.86	588	294	147	7	4	0.25	3	29.43	28.38
0.86	588	294	147	7	5	0.25	3	29.07	29.82
0.82	612.5	318.5	147	7	2	0.25	3	24.7	28.77
0.82	612.5	318.5	147	7	3	0.25	3	25.48	27.76
0.82	612.5	318.5	147	7	4	0.25	3	25.37	26.95
0.82	612.5	318.5	147	7	5	0.25	3	25.17	26.41
0.79	637	343	147	7	2	0.25	3	39.04	45.13
0.79	637	343	147	7	3	0.25	3	38.35	43.66
0.79	637	343	147	7	4	0.25	3	39.81	37.76
0.79	637	343	147	7	5	0.25	3	39.83	36.87
0.76	661.5	416.5	122.5	7	2	0.25	3	35.99	36.07
0.76	661.5	416.5	122.5	7	3	0.25	3	36.59	36.44
0.76	661.5	416.5	122.5	7	4	0.25	3	35.64	37.28
0.76	661.5	416.5	122.5	7	5	0.25	3	36.52	37.29
0.74	686	245	220.5	3.5	2	0.25	3	11.8	14.49
0.74	686	245	220.5	3.5	3	0.25	3	12.03	13.79
0.74	686	245	220.5	3.5	4	0.25	3	11.98	14.72
0.74	686	245	220.5	3.5	5	0.25	3	11.69	14.76
0.71	710.5	269.5	220.5	3.5	2	0.25	3	12.41	14.92
0.71	710.5	269.5	220.5	3.5	3	0.25	3	12.28	14.74
0.71	710.5	269.5	220.5	3.5	4	0.25	3	12.1	15.57
0.71	710.5	269.5	220.5	3.5	5	0.25	3	12.19	14.94
0.69	735	294	220.5	3.5	2	0.25	3	12.34	14.92
0.69	735	294	220.5	3.5	3	0.25	3	12.46	14.38
0.69	735	294	220.5	3.5	4	0.25	3	12.31	15.44
0.69	735	294	220.5	3.5	5	0.25	3	12.12	15.17
0.66	759.5	318.5	220.5	3.5	2	0.25	3	12.97	15.53
0.66	759.5	318.5	220.5	3.5	3	0.25	3	13.01	15.8
0.66	759.5	318.5	220.5	3.5	4	0.25	3	12.74	16.14
0.66	759.5	318.5	220.5	3.5	5	0.25	3	12.84	16.26
0.64	784	343	220.5	3.5	2	0.25	3	16.83	19.87
0.64	784	343	220.5	3.5	3	0.25	3	16.93	20.03
0.64	784	343	220.5	3.5	4	0.25	3	16.66	20.46
0.64	784	343	220.5	3.5	5	0.25	3	16.86	20.28
0.62	808.5	367.5	220.5	3.5	2	0.25	3	13.91	14.89
0.62	808.5	367.5	220.5	3.5	3	0.25	3	14.34	14.96
0.62	808.5	367.5	220.5	3.5	4	0.25	3	13.95	14.89
0.62	808.5	367.5	220.5	3.5	5	0.25	3	13.99	14.35
0.98	514.5	294	110.25	7	2	0.25	4	28.7	29.61
0.98	514.5	294	110.25	7	3	0.25	4	28.55	29.59
0.98	514.5	294	110.25	7	4	0.25	4	28.15	30.19
0.98	514.5	294	110.25	7	5	0.25	4	28.62	30.12
0.9	563.5	318.5	122.5	7	2	0.25	4	32.67	32.12
0.9	563.5	318.5	122.5	7	3	0.25	4	31.69	37.12
0.9	563.5	318.5	122.5	7	4	0.25	4	32.07	36.16
0.9	563.5	318.5	122.5	7	5	0.25	4	33.28	33.16
0.86	588	294	147	7	2	0.25	4	29.47	29.45
0.86	588	294	147	7	3	0.25	4	28.42	34.19
0.86	588	294	147	7	4	0.25	4	29.08	33.93
0.86	588	294	147	7	5	0.25	4	29.88	28.31
0.82	612.5	318.5	147	7	2	0.25	4	25.66	26.3
0.82	612.5	318.5	147	7	3	0.25	4	24.96	29.43
0.82	612.5	318.5	147	7	4	0.25	4	25.43	28.76
0.82	612.5	318.5	147	7	5	0.25	4	26	27.34
0.79	637	343	147	7	2	0.25	4	40	36.26
0.79	637	343	147	7	3	0.25	4	38.84	45.48
0.79	637	343	147	7	4	0.25	4	38.33	44.16
0.79	637	343	147	7	5	0.25	4	40.12	37.26
0.76	661.5	416.5	122.5	7	2	0.25	4	36.95	37.2
0.76	661.5	416.5	122.5	7	3	0.25	4	36.45	36.76
0.76	661.5	416.5	122.5	7	4	0.25	4	36.81	37.05
0.76	661.5	416.5	122.5	7	5	0.25	4	36.26	37.51
0.74	686	245	220.5	3.5	2	0.25	4	12.32	14.92
0.74	686	245	220.5	3.5	3	0.25	4	12.3	15.24
0.74	686	245	220.5	3.5	4	0.25	4	12.18	15.03
0.74	686	245	220.5	3.5	5	0.25	4	12.43	15.35
0.71	710.5	269.5	220.5	3.5	2	0.25	4	12.36	14.67
0.71	710.5	269.5	220.5	3.5	3	0.25	4	12.49	15.09
0.71	710.5	269.5	220.5	3.5	4	0.25	4	12.17	15.2
0.71	710.5	269.5	220.5	3.5	5	0.25	4	12.28	15.64
0.69	735	294	220.5	3.5	2	0.25	4	12.91	15.37
0.69	735	294	220.5	3.5	3	0.25	4	12.95	15.73
0.69	735	294	220.5	3.5	4	0.25	4	12.67	15.83
0.69	735	294	220.5	3.5	5	0.25	4	12.86	16.13
0.66	759.5	318.5	220.5	3.5	2	0.25	4	12.95	15.95
0.66	759.5	318.5	220.5	3.5	3	0.25	4	13	15.59
0.66	759.5	318.5	220.5	3.5	4	0.25	4	12.86	16.17
0.66	759.5	318.5	220.5	3.5	5	0.25	4	12.92	16.14
0.64	784	343	220.5	3.5	2	0.25	4	16.99	19.65
0.64	784	343	220.5	3.5	3	0.25	4	16.69	19.76
0.64	784	343	220.5	3.5	4	0.25	4	16.56	20.37
0.64	784	343	220.5	3.5	5	0.25	4	16.62	19.9
0.62	808.5	367.5	220.5	3.5	2	0.25	4	14.33	15.41
0.62	808.5	367.5	220.5	3.5	3	0.25	4	14.61	15.56
0.62	808.5	367.5	220.5	3.5	4	0.25	4	14.61	15.07
0.62	808.5	367.5	220.5	3.5	5	0.25	4	14.65	15.38
0.98	514.5	294	110.25	7	2	0.25	5	28.69	29.53
0.98	514.5	294	110.25	7	3	0.25	5	28.58	29.77
0.98	514.5	294	110.25	7	4	0.25	5	28.15	30
0.98	514.5	294	110.25	7	5	0.25	5	28.61	30.2
0.9	563.5	318.5	122.5	7	2	0.25	5	33.13	32.25
0.9	563.5	318.5	122.5	7	3	0.25	5	32.31	32
0.9	563.5	318.5	122.5	7	4	0.25	5	31.53	37.19
0.9	563.5	318.5	122.5	7	5	0.25	5	32.46	35.62
0.86	588	294	147	7	2	0.25	5	29.71	28.02
0.86	588	294	147	7	3	0.25	5	29.09	29.43
0.86	588	294	147	7	4	0.25	5	28.31	34.15
0.86	588	294	147	7	5	0.25	5	29.39	33.47
0.82	612.5	318.5	147	7	2	0.25	5	25.7	26.53
0.82	612.5	318.5	147	7	3	0.25	5	25.17	26.08
0.82	612.5	318.5	147	7	4	0.25	5	24.6	29.31
0.82	612.5	318.5	147	7	5	0.25	5	25.49	28.14
0.79	637	343	147	7	2	0.25	5	39.89	37.54
0.79	637	343	147	7	3	0.25	5	39.83	36.66
0.79	637	343	147	7	4	0.25	5	39.01	45.28
0.79	637	343	147	7	5	0.25	5	38.65	43.73
0.76	661.5	416.5	122.5	7	2	0.25	5	35.69	36.93
0.76	661.5	416.5	122.5	7	3	0.25	5	36.64	37.01
0.76	661.5	416.5	122.5	7	4	0.25	5	36.06	35.73
0.76	661.5	416.5	122.5	7	5	0.25	5	36.7	36.15
0.74	686	245	220.5	3.5	2	0.25	5	12.12	14.48
0.74	686	245	220.5	3.5	3	0.25	5	11.67	14.58
0.74	686	245	220.5	3.5	4	0.25	5	11.64	14.81
0.74	686	245	220.5	3.5	5	0.25	5	12.02	14.03
0.71	710.5	269.5	220.5	3.5	2	0.25	5	12.27	15.27
0.71	710.5	269.5	220.5	3.5	3	0.25	5	12.19	14.71
0.71	710.5	269.5	220.5	3.5	4	0.25	5	12.25	15.23
0.71	710.5	269.5	220.5	3.5	5	0.25	5	12.27	14.97
0.69	735	294	220.5	3.5	2	0.25	5	12.47	15.14
0.69	735	294	220.5	3.5	3	0.25	5	12.12	14.97
0.69	735	294	220.5	3.5	4	0.25	5	12.18	15.22
0.69	735	294	220.5	3.5	5	0.25	5	12.47	14.6
0.66	759.5	318.5	220.5	3.5	2	0.25	5	12.93	15.83
0.66	759.5	318.5	220.5	3.5	3	0.25	5	12.82	16.03
0.66	759.5	318.5	220.5	3.5	4	0.25	5	12.78	15.8
0.66	759.5	318.5	220.5	3.5	5	0.25	5	13.02	16.06
0.64	784	343	220.5	3.5	2	0.25	5	16.73	20.13
0.64	784	343	220.5	3.5	3	0.25	5	16.86	20.01
0.64	784	343	220.5	3.5	4	0.25	5	16.76	20.19
0.64	784	343	220.5	3.5	5	0.25	5	16.92	20.29
0.62	808.5	367.5	220.5	3.5	2	0.25	5	13.68	15.19
0.62	808.5	367.5	220.5	3.5	3	0.25	5	13.99	14.61
0.62	808.5	367.5	220.5	3.5	4	0.25	5	14.16	14.61
0.62	808.5	367.5	220.5	3.5	5	0.25	5	13.86	14.75
0.98	514.5	294	110.25	7	2	0.4	1	32.26	33.37
0.98	514.5	294	110.25	7	3	0.4	1	32.26	33.34
0.98	514.5	294	110.25	7	4	0.4	1	32.49	32.83
0.98	514.5	294	110.25	7	5	0.4	1	32.53	33.04
0.9	563.5	318.5	122.5	7	2	0.4	1	36.47	39.28
0.9	563.5	318.5	122.5	7	3	0.4	1	37.24	36.38
0.9	563.5	318.5	122.5	7	4	0.4	1	36.66	35.92
0.9	563.5	318.5	122.5	7	5	0.4	1	35.96	40.99
0.86	588	294	147	7	2	0.4	1	31.89	35.99
0.86	588	294	147	7	3	0.4	1	32.39	30.66
0.86	588	294	147	7	4	0.4	1	32.09	31.7
0.86	588	294	147	7	5	0.4	1	31.29	36.73
0.82	612.5	318.5	147	7	2	0.4	1	29.22	31.71
0.82	612.5	318.5	147	7	3	0.4	1	29.91	29.13
0.82	612.5	318.5	147	7	4	0.4	1	29.53	28.99
0.82	612.5	318.5	147	7	5	0.4	1	28.65	33.54
0.79	637	343	147	7	2	0.4	1	41.4	45.29
0.79	637	343	147	7	3	0.4	1	42.62	39.07
0.79	637	343	147	7	4	0.4	1	42.5	38.35
0.79	637	343	147	7	5	0.4	1	41.67	46.94
0.76	661.5	416.5	122.5	7	2	0.4	1	40.78	39.55
0.76	661.5	416.5	122.5	7	3	0.4	1	39.97	40.85
0.76	661.5	416.5	122.5	7	4	0.4	1	40.71	40.63
0.76	661.5	416.5	122.5	7	5	0.4	1	40.43	39.48
0.74	686	245	220.5	3.5	2	0.4	1	14.52	16.94
0.74	686	245	220.5	3.5	3	0.4	1	14.61	17.25
0.74	686	245	220.5	3.5	4	0.4	1	14.5	17.03
0.74	686	245	220.5	3.5	5	0.4	1	14.55	17.25
0.71	710.5	269.5	220.5	3.5	2	0.4	1	14.51	17.1
0.71	710.5	269.5	220.5	3.5	3	0.4	1	14.6	17.51
0.71	710.5	269.5	220.5	3.5	4	0.4	1	14.5	17.12
0.71	710.5	269.5	220.5	3.5	5	0.4	1	14.58	17.47
0.69	735	294	220.5	3.5	2	0.4	1	14.51	16.5
0.69	735	294	220.5	3.5	3	0.4	1	14.7	17
0.69	735	294	220.5	3.5	4	0.4	1	14.42	16.87
0.69	735	294	220.5	3.5	5	0.4	1	14.42	17.2
0.66	759.5	318.5	220.5	3.5	2	0.4	1	15.23	18.14
0.66	759.5	318.5	220.5	3.5	3	0.4	1	15.23	18.03
0.66	759.5	318.5	220.5	3.5	4	0.4	1	15.23	18.14
0.66	759.5	318.5	220.5	3.5	5	0.4	1	15.23	17.95
0.64	784	343	220.5	3.5	2	0.4	1	19.52	22.72
0.64	784	343	220.5	3.5	3	0.4	1	19.36	22.73
0.64	784	343	220.5	3.5	4	0.4	1	19.48	22.72
0.64	784	343	220.5	3.5	5	0.4	1	19.42	22.53
0.62	808.5	367.5	220.5	3.5	2	0.4	1	15.09	17.2
0.62	808.5	367.5	220.5	3.5	3	0.4	1	17.17	17.21
0.62	808.5	367.5	220.5	3.5	4	0.4	1	17.14	17.15
0.62	808.5	367.5	220.5	3.5	5	0.4	1	17.14	17.2
0.98	514.5	294	110.25	7	2	0.4	2	32.82	32.96
0.98	514.5	294	110.25	7	3	0.4	2	32.71	33.13
0.98	514.5	294	110.25	7	4	0.4	2	32.24	33.94
0.98	514.5	294	110.25	7	5	0.4	2	32.72	33.78
0.9	563.5	318.5	122.5	7	2	0.4	2	35.84	38.35
0.9	563.5	318.5	122.5	7	3	0.4	2	36.57	35.39
0.9	563.5	318.5	122.5	7	4	0.4	2	36.06	34.94
0.9	563.5	318.5	122.5	7	5	0.4	2	35.69	40.66
0.86	588	294	147	7	2	0.4	2	32.48	35.48
0.86	588	294	147	7	3	0.4	2	32.74	30.53
0.86	588	294	147	7	4	0.4	2	32.13	32.28
0.86	588	294	147	7	5	0.4	2	31.64	36.86
0.82	612.5	318.5	147	7	2	0.4	2	28.95	30.34
0.82	612.5	318.5	147	7	3	0.4	2	29.49	27.93
0.82	612.5	318.5	147	7	4	0.4	2	28.64	28.95
0.82	612.5	318.5	147	7	5	0.4	2	28.01	32.92
0.79	637	343	147	7	2	0.4	2	41.64	45.59
0.79	637	343	147	7	3	0.4	2	43.1	39.41
0.79	637	343	147	7	4	0.4	2	42.74	38.84
0.79	637	343	147	7	5	0.4	2	41.92	48.03
0.76	661.5	416.5	122.5	7	2	0.4	2	40.78	39.48
0.76	661.5	416.5	122.5	7	3	0.4	2	40.15	40.4
0.76	661.5	416.5	122.5	7	4	0.4	2	40.57	40.47
0.76	661.5	416.5	122.5	7	5	0.4	2	40.42	39.7
0.74	686	245	220.5	3.5	2	0.4	2	14.54	16.43
0.74	686	245	220.5	3.5	3	0.4	2	14.45	16.93
0.74	686	245	220.5	3.5	4	0.4	2	14.18	16.99
0.74	686	245	220.5	3.5	5	0.4	2	14.5	17.03
0.71	710.5	269.5	220.5	3.5	2	0.4	2	14.7	16.77
0.71	710.5	269.5	220.5	3.5	3	0.4	2	14.66	17.37
0.71	710.5	269.5	220.5	3.5	4	0.4	2	14.4	17.27
0.71	710.5	269.5	220.5	3.5	5	0.4	2	14.71	17.51
0.69	735	294	220.5	3.5	2	0.4	2	14.75	16.44
0.69	735	294	220.5	3.5	3	0.4	2	14.71	17.01
0.69	735	294	220.5	3.5	4	0.4	2	14.33	17.23
0.69	735	294	220.5	3.5	5	0.4	2	14.62	17.22
0.66	759.5	318.5	220.5	3.5	2	0.4	2	15.34	17.85
0.66	759.5	318.5	220.5	3.5	3	0.4	2	15.29	17.89
0.66	759.5	318.5	220.5	3.5	4	0.4	2	15.09	18.36
0.66	759.5	318.5	220.5	3.5	5	0.4	2	15.3	18.15
0.64	784	343	220.5	3.5	2	0.4	2	19.2	21.72
0.64	784	343	220.5	3.5	3	0.4	2	18.88	22.07
0.64	784	343	220.5	3.5	4	0.4	2	18.9	22.09
0.64	784	343	220.5	3.5	5	0.4	2	19.12	21.93
0.62	808.5	367.5	220.5	3.5	2	0.4	2	16.76	17.36
0.62	808.5	367.5	220.5	3.5	3	0.4	2	17.23	17.38
0.62	808.5	367.5	220.5	3.5	4	0.4	2	17.26	16.86
0.62	808.5	367.5	220.5	3.5	5	0.4	2	17.15	16.99
0.98	514.5	294	110.25	7	2	0.4	3	32.82	32.78
0.98	514.5	294	110.25	7	3	0.4	3	32.69	33.24
0.98	514.5	294	110.25	7	4	0.4	3	32.23	33.86
0.98	514.5	294	110.25	7	5	0.4	3	32.75	34
0.9	563.5	318.5	122.5	7	2	0.4	3	34.24	37.26
0.9	563.5	318.5	122.5	7	3	0.4	3	34.95	35.04
0.9	563.5	318.5	122.5	7	4	0.4	3	35.05	33.82
0.9	563.5	318.5	122.5	7	5	0.4	3	34.29	33.31
0.86	588	294	147	7	2	0.4	3	31.28	35.22
0.86	588	294	147	7	3	0.4	3	32.12	34.7
0.86	588	294	147	7	4	0.4	3	32.05	30.11
0.86	588	294	147	7	5	0.4	3	31.84	31.6
0.82	612.5	318.5	147	7	2	0.4	3	28.67	32.43
0.82	612.5	318.5	147	7	3	0.4	3	29.67	30.65
0.82	612.5	318.5	147	7	4	0.4	3	29.47	29.77
0.82	612.5	318.5	147	7	5	0.4	3	28.91	29.64
0.79	637	343	147	7	2	0.4	3	41.26	46.44
0.79	637	343	147	7	3	0.4	3	41.3	44.18
0.79	637	343	147	7	4	0.4	3	42.49	38.81
0.79	637	343	147	7	5	0.4	3	42.08	38.23
0.76	661.5	416.5	122.5	7	2	0.4	3	39.32	38.17
0.76	661.5	416.5	122.5	7	3	0.4	3	39.84	38.48
0.76	661.5	416.5	122.5	7	4	0.4	3	38.89	39.66
0.76	661.5	416.5	122.5	7	5	0.4	3	39.68	40.1
0.74	686	245	220.5	3.5	2	0.4	3	13.97	16.08
0.74	686	245	220.5	3.5	3	0.4	3	14.22	15.39
0.74	686	245	220.5	3.5	4	0.4	3	14.1	16.57
0.74	686	245	220.5	3.5	5	0.4	3	13.78	16.6
0.71	710.5	269.5	220.5	3.5	2	0.4	3	14.07	16.11
0.71	710.5	269.5	220.5	3.5	3	0.4	3	14.03	15.47
0.71	710.5	269.5	220.5	3.5	4	0.4	3	13.94	16.7
0.71	710.5	269.5	220.5	3.5	5	0.4	3	13.86	16.1
0.69	735	294	220.5	3.5	2	0.4	3	14.32	16.35
0.69	735	294	220.5	3.5	3	0.4	3	14.56	15.84
0.69	735	294	220.5	3.5	4	0.4	3	14.33	16.99
0.69	735	294	220.5	3.5	5	0.4	3	14.08	17.02
0.66	759.5	318.5	220.5	3.5	2	0.4	3	15.16	17.04
0.66	759.5	318.5	220.5	3.5	3	0.4	3	15.18	17.63
0.66	759.5	318.5	220.5	3.5	4	0.4	3	14.72	18.1
0.66	759.5	318.5	220.5	3.5	5	0.4	3	14.9	18.22
0.64	784	343	220.5	3.5	2	0.4	3	18.48	20.78
0.64	784	343	220.5	3.5	3	0.4	3	18.71	20.72
0.64	784	343	220.5	3.5	4	0.4	3	18.48	21.54
0.64	784	343	220.5	3.5	5	0.4	3	18.46	21.53
0.62	808.5	367.5	220.5	3.5	2	0.4	3	16.47	16.9
0.62	808.5	367.5	220.5	3.5	3	0.4	3	16.35	17.14
0.62	808.5	367.5	220.5	3.5	4	0.4	3	16.55	16.56
0.62	808.5	367.5	220.5	3.5	5	0.4	3	16.74	16
0.98	514.5	294	110.25	7	2	0.4	4	32.85	32.95
0.98	514.5	294	110.25	7	3	0.4	4	32.67	33.06
0.98	514.5	294	110.25	7	4	0.4	4	32.21	33.95
0.98	514.5	294	110.25	7	5	0.4	4	32.74	33.88
0.9	563.5	318.5	122.5	7	2	0.4	4	36.45	33.98
0.9	563.5	318.5	122.5	7	3	0.4	4	35.73	39.92
0.9	563.5	318.5	122.5	7	4	0.4	4	35.4	39.22
0.9	563.5	318.5	122.5	7	5	0.4	4	36.57	36.1
0.86	588	294	147	7	2	0.4	4	32.38	31.53
0.86	588	294	147	7	3	0.4	4	31.66	36.2
0.86	588	294	147	7	4	0.4	4	32.15	36.21
0.86	588	294	147	7	5	0.4	4	32.75	31
0.82	612.5	318.5	147	7	2	0.4	4	28.93	28.2
0.82	612.5	318.5	147	7	3	0.4	4	28.05	32.35
0.82	612.5	318.5	147	7	4	0.4	4	28.64	31.14
0.82	612.5	318.5	147	7	5	0.4	4	29.52	28.43
0.79	637	343	147	7	2	0.4	4	42.77	38.33
0.79	637	343	147	7	3	0.4	4	41.73	47.59
0.79	637	343	147	7	4	0.4	4	41.32	46.23
0.79	637	343	147	7	5	0.4	4	42.96	39.56
0.76	661.5	416.5	122.5	7	2	0.4	4	40.68	40.36
0.76	661.5	416.5	122.5	7	3	0.4	4	40.4	39.67
0.76	661.5	416.5	122.5	7	4	0.4	4	40.6	39.85
0.76	661.5	416.5	122.5	7	5	0.4	4	40.11	40.77
0.74	686	245	220.5	3.5	2	0.4	4	14.37	16.61
0.74	686	245	220.5	3.5	3	0.4	4	14.48	16.74
0.74	686	245	220.5	3.5	4	0.4	4	14.32	16.9
0.74	686	245	220.5	3.5	5	0.4	4	14.44	17.32
0.71	710.5	269.5	220.5	3.5	2	0.4	4	14.6	16.85
0.71	710.5	269.5	220.5	3.5	3	0.4	4	14.7	17.2
0.71	710.5	269.5	220.5	3.5	4	0.4	4	14.47	17.23
0.71	710.5	269.5	220.5	3.5	5	0.4	4	14.66	17.74
0.69	735	294	220.5	3.5	2	0.4	4	14.54	16.81
0.69	735	294	220.5	3.5	3	0.4	4	14.62	16.88
0.69	735	294	220.5	3.5	4	0.4	4	14.53	16.9
0.69	735	294	220.5	3.5	5	0.4	4	14.71	17.39
0.66	759.5	318.5	220.5	3.5	2	0.4	4	15.34	17.86
0.66	759.5	318.5	220.5	3.5	3	0.4	4	15.29	17.82
0.66	759.5	318.5	220.5	3.5	4	0.4	4	15.09	18.36
0.66	759.5	318.5	220.5	3.5	5	0.4	4	15.3	18.24
0.64	784	343	220.5	3.5	2	0.4	4	19.06	21.68
0.64	784	343	220.5	3.5	3	0.4	4	19.13	21.54
0.64	784	343	220.5	3.5	4	0.4	4	19	22.25
0.64	784	343	220.5	3.5	5	0.4	4	18.84	22.49
0.62	808.5	367.5	220.5	3.5	2	0.4	4	16.44	17.1
0.62	808.5	367.5	220.5	3.5	3	0.4	4	16.9	16.79
0.62	808.5	367.5	220.5	3.5	4	0.4	4	16.94	16.58
0.62	808.5	367.5	220.5	3.5	5	0.4	4	16.77	16.79
0.98	514.5	294	110.25	7	2	0.4	5	32.84	32.88
0.98	514.5	294	110.25	7	3	0.4	5	32.72	33.23
0.98	514.5	294	110.25	7	4	0.4	5	32.21	33.76
0.98	514.5	294	110.25	7	5	0.4	5	32.73	34.01
0.9	563.5	318.5	122.5	7	2	0.4	5	35.67	33.94
0.9	563.5	318.5	122.5	7	3	0.4	5	35.01	33.14
0.9	563.5	318.5	122.5	7	4	0.4	5	34.72	38.79
0.9	563.5	318.5	122.5	7	5	0.4	5	35.24	37.27
0.86	588	294	147	7	2	0.4	5	32.31	29.69
0.86	588	294	147	7	3	0.4	5	31.81	31.2
0.86	588	294	147	7	4	0.4	5	31.12	36.26
0.86	588	294	147	7	5	0.4	5	32.06	35.71
0.82	612.5	318.5	147	7	2	0.4	5	30	29.93
0.82	612.5	318.5	147	7	3	0.4	5	29.5	29.56
0.82	612.5	318.5	147	7	4	0.4	5	29.06	33.84
0.82	612.5	318.5	147	7	5	0.4	5	29.92	32.54
0.79	637	343	147	7	2	0.4	5	42.11	38.56
0.79	637	343	147	7	3	0.4	5	41.96	37.7
0.79	637	343	147	7	4	0.4	5	41.09	47.01
0.79	637	343	147	7	5	0.4	5	40.79	44.87
0.76	661.5	416.5	122.5	7	2	0.4	5	38.82	39.37
0.76	661.5	416.5	122.5	7	3	0.4	5	39.72	39.8
0.76	661.5	416.5	122.5	7	4	0.4	5	39.31	37.79
0.76	661.5	416.5	122.5	7	5	0.4	5	39.86	38.18
0.74	686	245	220.5	3.5	2	0.4	5	14.41	16.69
0.74	686	245	220.5	3.5	3	0.4	5	14.19	16.62
0.74	686	245	220.5	3.5	4	0.4	5	14.17	16.94
0.74	686	245	220.5	3.5	5	0.4	5	14.39	16.7
0.71	710.5	269.5	220.5	3.5	2	0.4	5	12.43	15.59
0.71	710.5	269.5	220.5	3.5	3	0.4	5	12.63	14.58
0.71	710.5	269.5	220.5	3.5	4	0.4	5	12.76	15.33
0.71	710.5	269.5	220.5	3.5	5	0.4	5	12.42	15.31
0.69	735	294	220.5	3.5	2	0.4	5	14.12	16.63
0.69	735	294	220.5	3.5	3	0.4	5	14.28	15.87
0.69	735	294	220.5	3.5	4	0.4	5	14.37	16.54
0.69	735	294	220.5	3.5	5	0.4	5	14.21	16.74
0.66	759.5	318.5	220.5	3.5	2	0.4	5	14.96	17.64
0.66	759.5	318.5	220.5	3.5	3	0.4	5	14.92	17.79
0.66	759.5	318.5	220.5	3.5	4	0.4	5	14.92	17.55
0.66	759.5	318.5	220.5	3.5	5	0.4	5	15.16	18.06
0.64	784	343	220.5	3.5	2	0.4	5	17.69	20.82
0.64	784	343	220.5	3.5	3	0.4	5	18.19	20.21
0.64	784	343	220.5	3.5	4	0.4	5	18.16	20.71
0.64	784	343	220.5	3.5	5	0.4	5	17.88	21.4
0.62	808.5	367.5	220.5	3.5	2	0.4	5	16.54	16.88
0.62	808.5	367.5	220.5	3.5	3	0.4	5	16.44	17.11
0.62	808.5	367.5	220.5	3.5	4	0.4	5	16.48	16.61
0.62	808.5	367.5	220.5	3.5	5	0.4	5	16.64	16.03
